# Supplementary material for: Comparative study of Plasmodium falciparum msp-1 and msp-2 Genetic Diversity in Isolates from Rural and Urban Areas in the South of Brazzaville, Republic of Congo
Source: MDPI journal article supplement (doi:10.3390/pathogens12050742), 2023-05-22
Supplement: s1 [file s1]

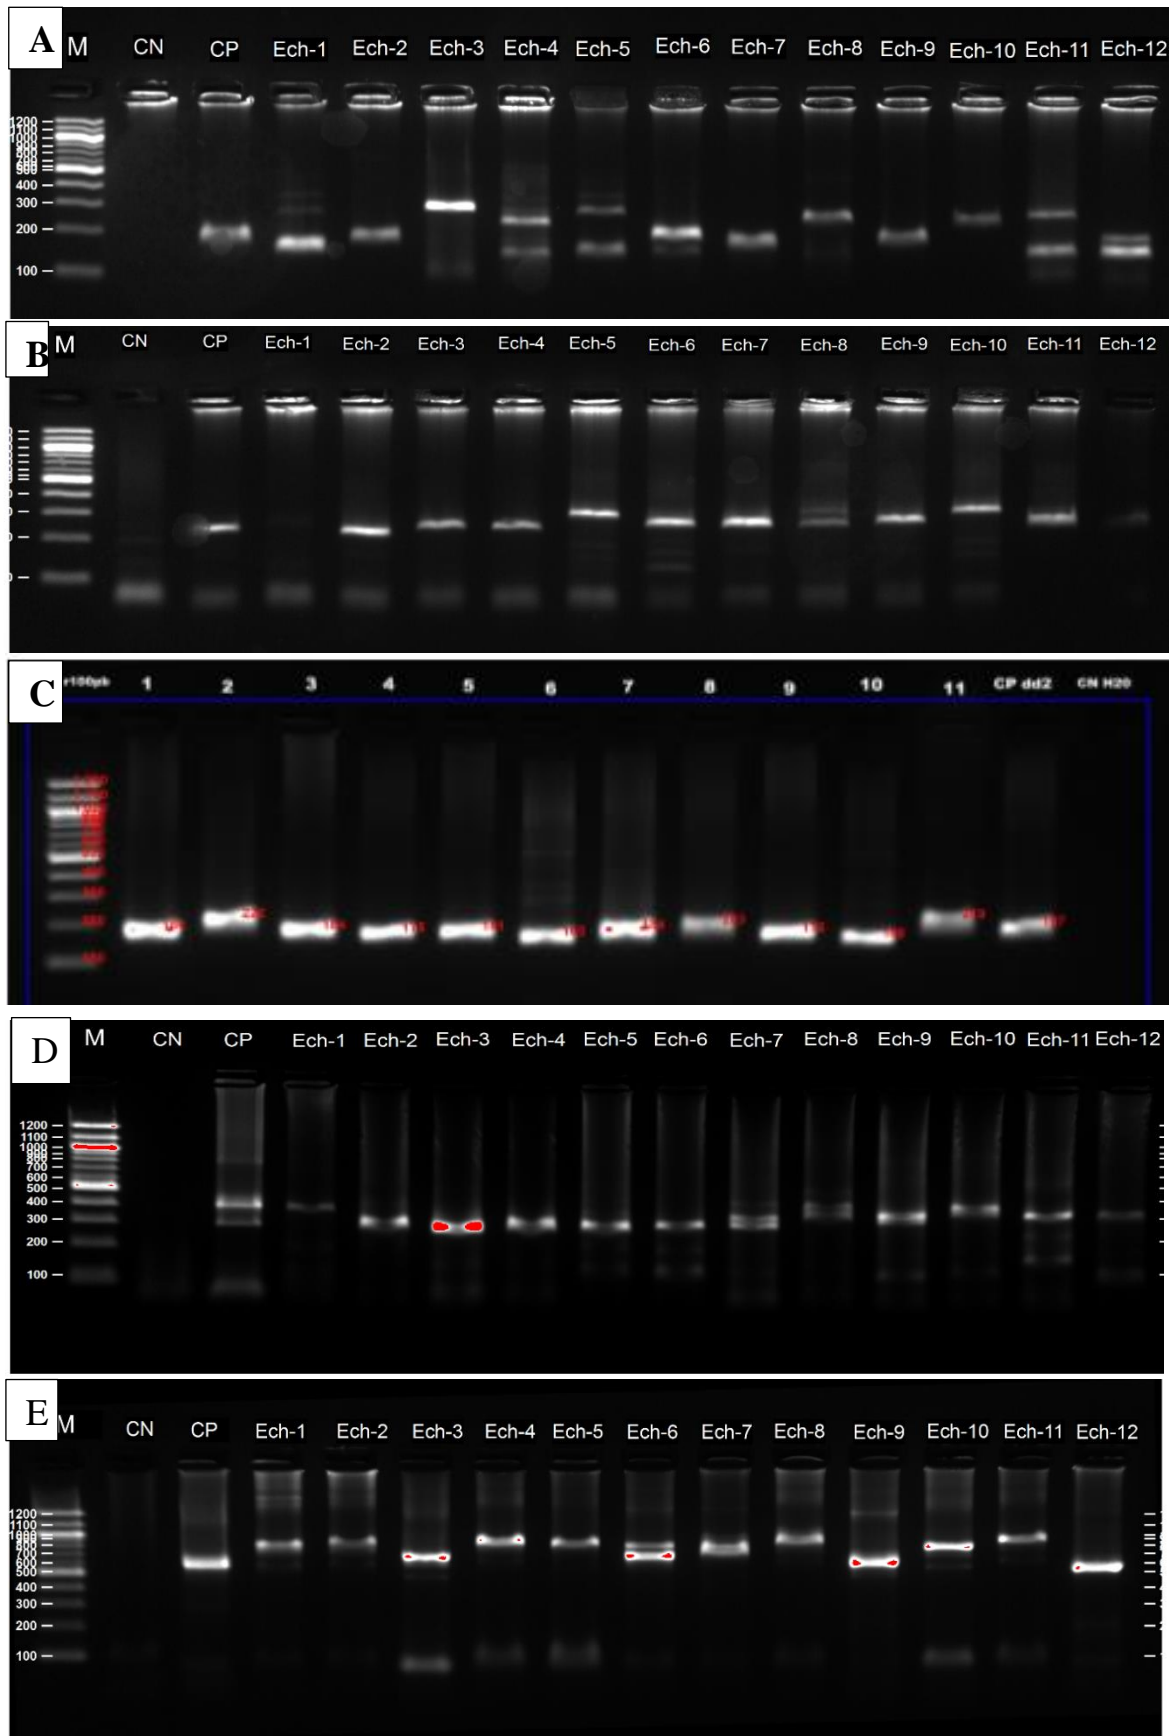

**Figure S1:** Electrophoreses of pfmsp1 and pf msp2 PCR showing the allelic families K1 in (A), MAD20 in (B), RO33 in (C), FC27 in (D) and 3D7 in (E)
