# Supplementary material for: Comparative study of Plasmodium falciparum msp-1 and msp-2 Genetic Diversity in Isolates from Rural and Urban Areas in the South of Brazzaville, Republic of Congo
Source: MDPI journal article supplement (doi:10.3390/pathogens12050742), 2023-05-22
Supplement: s1 [file s1]

**Table S1:** Primary and secondary PCR primers for *msp1* and *msp2*

| Gene | PCR round | Primer name | Sequence (5'-3')               | An. T° | Positive control |
|------|-----------|-------------|--------------------------------|--------|------------------|
| Msp1 | Primary   | Lisa-1      | ACATGAAAGTTATCAAGAAGTTGTC      | 62°C   | -                |
|      |           | Lisa-2      | TACGTCTAATTCATTTGCACGAA        |        |                  |
|      | Secondary | K1-F        | AAGAAATTACTAGAAAAGGTGCAAGTG    | 64°C   | 3D7              |
|      |           | K1-R        | AGATGAAGTATTTGAACGAGGTAAAGTG   | 67°C   | HB3              |
|      |           | MAD-F       | TGAATTATCTGAAGGATTTGTACGTCTTGA |        |                  |
|      |           | MAD-R       | GAACAAGTGGAACAGCTGTTA          | 45°C   | Dd2              |
|      |           | RO-F        | GAGCAAATACTCAGGTTGTTGCAAAGC    |        |                  |
|      |           | RO-R        | ACGATTTGCAGCACCTGGAGATCT       |        |                  |
| Msp2 | Primary   | MSA2-1      | ATGAAGGTAATTAACATTGTCTATTATA   | 62°C   | -                |
|      |           | MSA2-4      | ATATGGCAAAAGATAAAACAAGTGTGCTG  |        |                  |
|      | Secondary | 3D7-1       | GCAGAAAGTAAGCCTTCTACTGGTGCT    | 55°C   | 3D7              |
|      |           | 3D7-2       | GATTTGTTTCGGCATTATTATGA        | 55°C   | Dd2              |
|      |           | FC27-1      | GCAAATGAAGGTTCTAATACTAATAG     |        |                  |
|      |           | FC27-2      | GCTTTGGGTCCTTCTTCAGTTGATTC     |        |                  |

**An. T°:** Annealing temperature

**Table S2:** Allelic family's frequencies of msp1 according to socio-demographic characteristics in rural and urban area

| Parameters         | n1; n2   | Rural      |            |            |         | Urban     |           |           |         |
|--------------------|----------|------------|------------|------------|---------|-----------|-----------|-----------|---------|
|                    |          | K-1        | MAD-20     | RO33       | p-value | K-1       | MAD-20    | RO33      | p-value |
| Season             |          |            |            |            |         |           |           |           |         |
| Dry                | 317; 126 | 101 (31.9) | 85 (26.8)  | 131 (41.3) | 0.0002  | 61 (48.4) | 20 (15.9) | 45 (35.7) | 0.0839  |
| Rainy              | 562; 136 | 243 (43.2) | 160 (28.5) | 159 (28.3) |         | 58 (42.6) | 37 (27.2) | 41 (30.1) |         |
| Age group, (years) |          |            |            |            |         |           |           |           |         |
| < 5                | 82; 11   | 29 (35.4)  | 25 (30.5)  | 28 (34.1)  | <0.0001 | 5 (45.5)  | 4 (36.4)  | 2 (18.2)  | 0.5568  |
| [5 - 15[           | 278; 105 | 131 (47.1) | 26 (9.4)   | 121 (43.5) |         | 44 (41.9) | 25 (23.8) | 36 (34.3) |         |
| > 15               | 441; 146 | 184 (41.7) | 116 (26.3) | 141 (32.0) |         | 70 (47.9) | 28 (19.2) | 48 (32.9) |         |
| Type of infection  |          |            |            |            |         |           |           |           |         |
| Microscopic        | 389; 67  | 146 (37.5) | 120 (30.8) | 123 (31.6) | 0.2115  | 30 (44.8) | 18 (26.9) | 19 (28.4) | 0.4026  |
| Sub-microscopic    | 490; 194 | 198 (40.4) | 125 (25.5) | 167 (34.1) |         | 89 (45.9) | 38 (19.6) | 67 (34.5) |         |
| Clinical status    |          |            |            |            |         |           |           |           |         |
| Asymptomatic       | 233; 57  | 93 (40.0)  | 67 (28.8)  | 73 (31.2)  | 0.4234  | 19 (33.3) | 19 (33.4) | 19 (33.3) | 0.5721  |
| Symptomatic        | 156; 22  | 53 (34.0)  | 53 (34.0)  | 50 (32.0)  |         | 10 (45.5) | 5 (22.7)  | 7 (31.8)  |         |

**n1:** Total number of fragments for each parameter in rural area. **n2:** Total number of fragments for each parameter in urban area

**Table S3:** Allelic family's frequencies of msp2 according to socio-demographic characteristics in rural and urban area

| Parameter         | n1; n2   | Rural      |            |         | Urban      |           |         |
|-------------------|----------|------------|------------|---------|------------|-----------|---------|
|                   |          | FC27       | 3D7        | p-value | FC27       | 3D7       | p-value |
| Season            |          |            |            |         |            |           |         |
| Dry               | 317; 51  | 194 (61.2) | 123 (38.8) | 0.1729  | 25 (49.0)  | 26 (51.0) | 0.3900  |
| Rainy             | 547; 161 | 360 (65.8) | 187 (34.2) |         | 90 (56.0)  | 71 (44.0) |         |
| Age group (years) |          |            |            |         |            |           |         |
| < 5               | 67; 9    | 32 (47.8)  | 35 (52.2)  | 0.0113  | 2 (22.2)   | 7 (77.8)  | 0.0955  |
| [5 - 15[          | 353; 100 | 236 (67.0) | 117 (33.0) |         | 59 (59.0)  | 41 (41.0) |         |
| > 15              | 444; 102 | 286 (64.4) | 158 (35.6) |         | 54 (53.0)) | 48 (47.0) |         |
| Type of infection |          |            |            |         |            |           |         |
| Microscopic       | 414; 92  | 259 (62.6) | 155 (37.4) | 0.3592  | 54 (58.7)  | 38 (41.3) | 0.3119  |
| Sub-microscopic   | 450; 118 | 295 (65.6) | 155 (34.4) |         | 61 (51.7)  | 57 (48.3) |         |
| Clinical status   |          |            |            |         |            |           |         |
| Asymptomatic      | 254; 61  | 159 (62.6) | 95 (37.4)  | 0.9839  | 34 (55.7)  | 27(44.3)  | 0.3184  |
| Symptomatic       | 160; 30  | 100 (62.5) | 60 (37.5)  |         | 20 (66.7)  | 10 (33.3) |         |

**n1:** Total number of fragments for each parameter in rural area. **n2:** Total number of fragments for each parameter in urban area
